# Supplementary material for: Hydrogen bonding interactions in single component molecular conductors based on metal (Ni, Au) bis(dithiolene) complexes
Source: Royal Society of Chemistry journal article supplement (doi:10.1039/d0dt00960a), 2020-01-01
Supplement: d0dt00960a1.pdf [file d0dt00960a1.pdf]

## Hydrogen bonding interactions in single component molecular conductors based on metal (Ni, Au) bis(dithiolene) complexes†

Hadi Hachem, Nathalie Bellec, Marc Fourmigué\* and Dominique Lorcy\*

*Univ Rennes, CNRS, ISCR (Institut des Sciences Chimiques de Rennes) - UMR 6226, F-35000  
Rennes, France. Email : marc.fourmigue@univ-rennes1.fr, dominique.lorcy@univ-  
rennes1.fr*

### Supplementary information

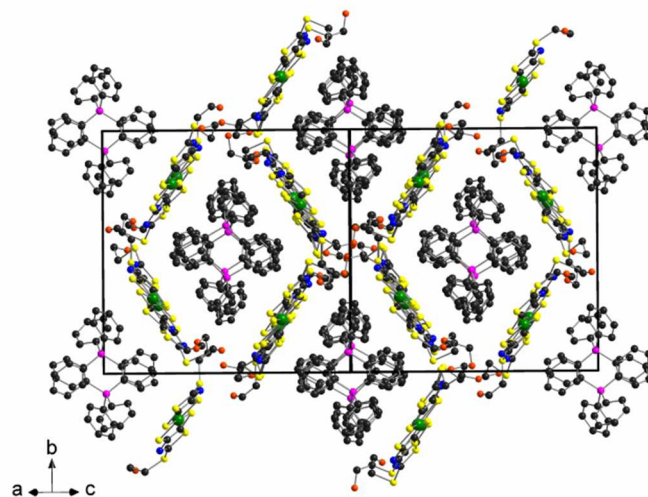

**Fig. S1** Detail of the unit cell of [Ph<sub>4</sub>P][Au(HOEt-tzdt)<sub>2</sub>]

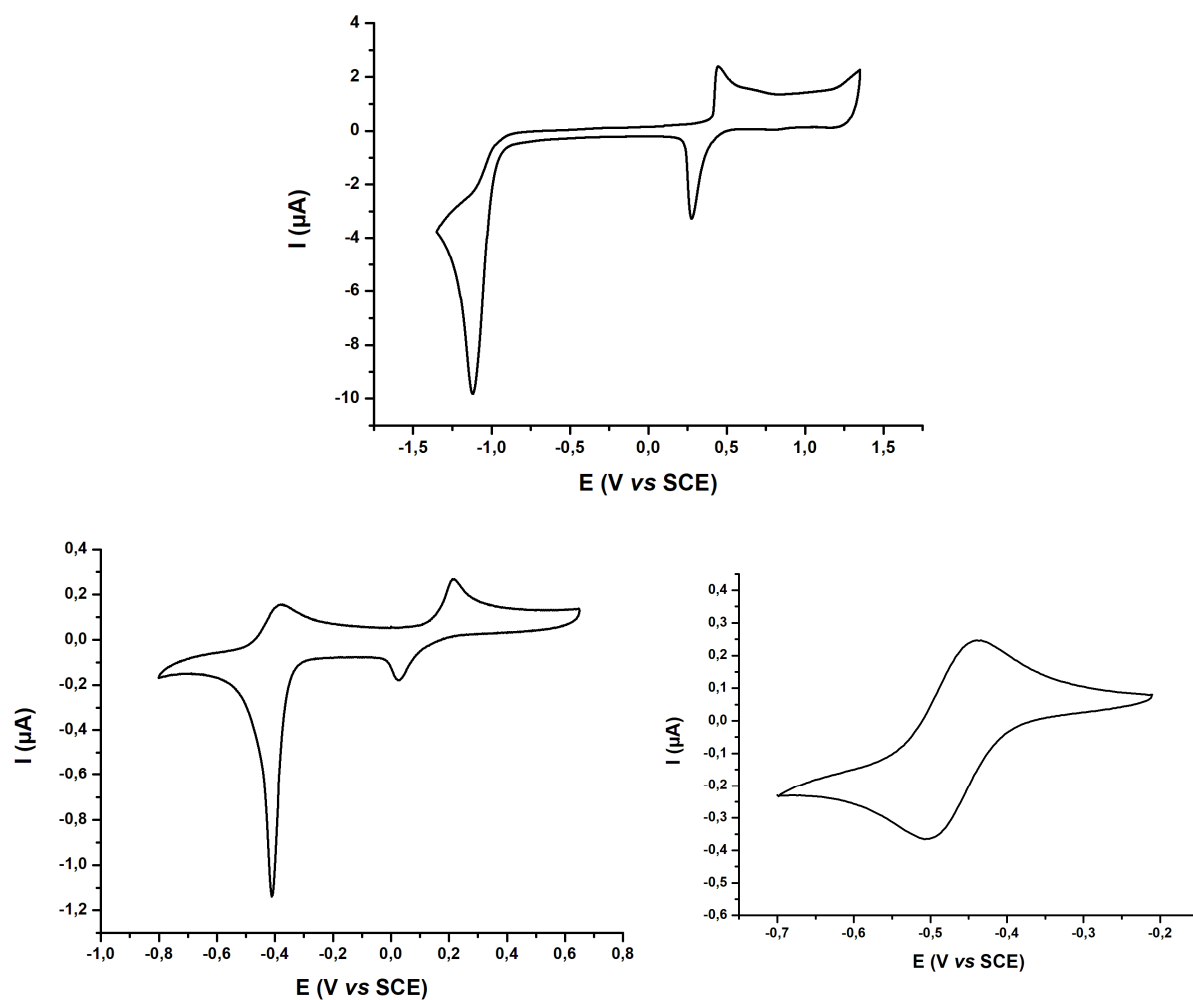

**Fig. S2** CVs of  $[\text{Ph}_4\text{P}][\text{Au}(\text{HOEt-tzdt})_2]$  (top) and  $[\text{Ph}_4\text{P}][\text{Ni}(\text{HOEt-tzdt})_2]$  (bottom left) and scan of the first oxidation process of  $[\text{Ph}_4\text{P}][\text{Ni}(\text{HOEt-tzdt})_2]$  (bottom right) in  $\text{CH}_2\text{Cl}_2$  with 0.1M  $\text{NBu}_4\text{PF}_6$ , at  $100 \text{ mV}\cdot\text{s}^{-1}$

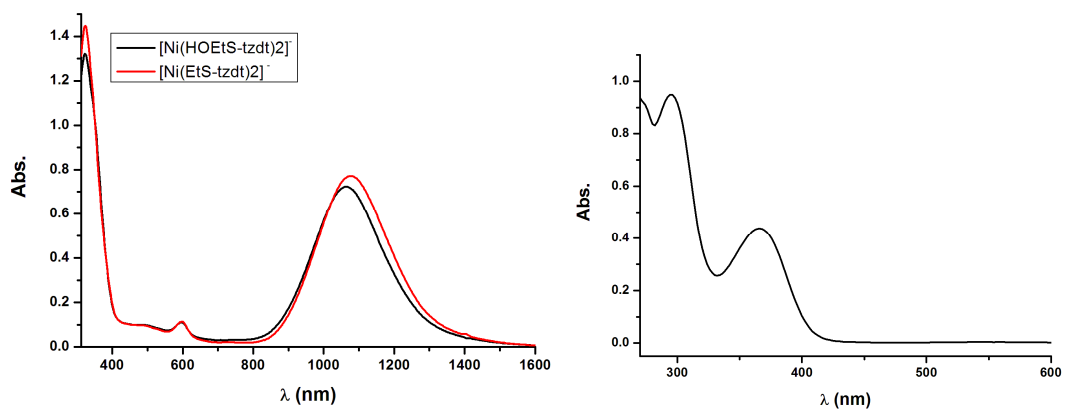

**Fig S3** UV-vis-NIR spectra of  $[\text{Ni}(\text{RS-tzdt})_2]^{-1}$  ( $\text{R} = \text{EtOH}, \text{Et}$ ) (left), and UV-vis Spectrum of  $[\text{Au}(\text{HOEtS-tzdt})_2]^{-1}$  (right).

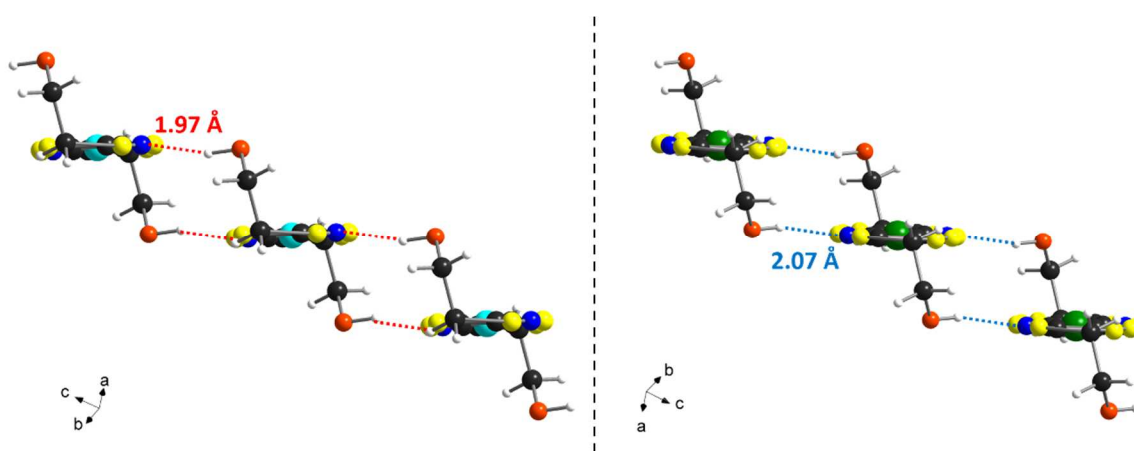

**Fig S4** Hydrogen-bonded chains of  $[\text{Ni}(\text{HOEtS-tzdt})_2]^0$  (left), and  $[\text{Au}(\text{HOEtS-tzdt})_2]^0$  (right) running along  $c$ .

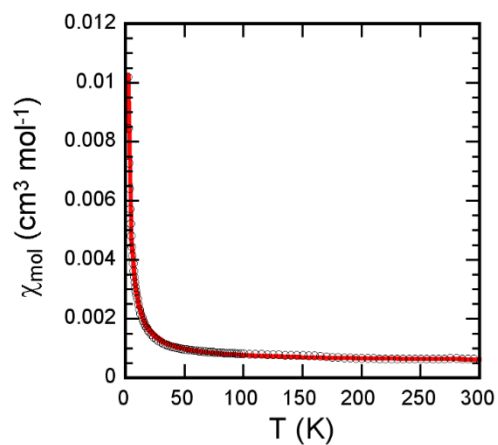

**Fig S5.** Temperature dependence of the magnetic susceptibility of  $[\text{Au}(\text{HOEt-tzdt})_2]$ .

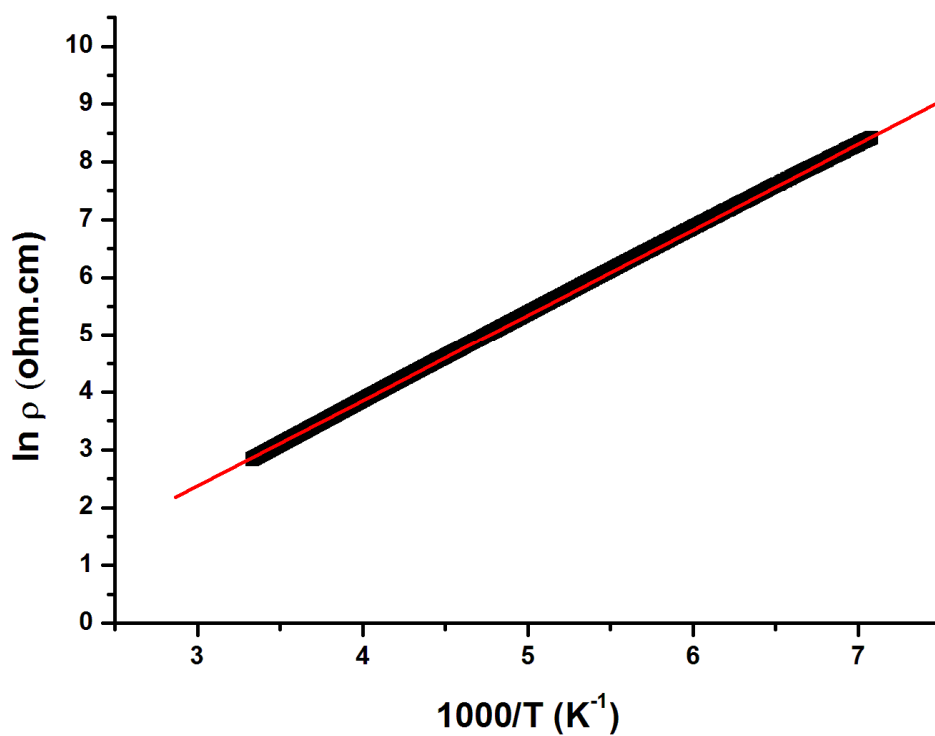

**Fig S6.** Resistivity data of  $[\text{Au}(\text{HOEt-tzdt})_2]$  The red line is the fit to the data giving the activation energy  $E_a$ .

## Band structure calculation

The exponents, contraction coefficients, and atomic parameters are detailed below

STO **Ni** 4s. 4p. 3d.

-9.170000 1.825000 1.00000  
-5.150000 1.125000 1.00000  
-13.490000 5.750000 0.568300 2.000000 0.629200

STO **Pt** 6s. 6p. 5d.

-9.077000 2.554000 1.00000  
-5.475000 2.554000 1.00000  
-12.590000 6.013000 0.633400 2.696000 0.551300

STO **Au** 6s. 6p. 5d.

-10.920000 2.602000 1.00000  
-5.550000 2.584000 1.00000  
-15.076000 6.163000 0.685100 2.794000 0.569600

STO **S** 3s. 3p.

-20.000000 2.662000 0.556400 1.688000 0.487300  
-13.300000 2.338000 0.521200 1.333000 0.544300

STO **Se** 4s. 4p.

-20.500000 3.138700 0.616250 1.889960 0.512890  
-13.200000 2.715040 0.550890 1.511400 0.572150

STO **C** 2s. 2p.

-21.400000 1.625000 1.00000  
-11.400000 1.625000 1.00000

STO **H** 1s.

-13.600000 1.300000 1.00000

STO **N** 2s. 2p.

-26.000000 1.950000 1.00000  
-13.400000 1.950000 1.00000
